1 **Predicting species distributions with environmental time series data and deep learning**

2

3 Austin M. Smith<sup>1\*</sup>, César Capinha<sup>2,3</sup>, Andrew M. Kramer<sup>1</sup>

4

5 <sup>1</sup>Department of Integrative Biology, University of South Florida, 4202 E. Fowler Ave SCA 110  
6 Tampa, FL 33620.

7 <sup>2</sup>Centre of Geographical Studies, Institute of Geography and Spatial Planning, University of  
8 Lisbon, Rua Branca Edmée Marques, 1600-276 Lisboa, Portugal

9 <sup>3</sup>Associated Laboratory Terra, Portugal.

10 \*Corresponding author email: [amsmith11@usf.edu](mailto:amsmith11@usf.edu)

11

12 Author contributions: AMS: Conceptualization, Data Curation, Methodology, Software, Writing  
13 – original draft, Writing – review and editing, Visualization. CC: Conceptualization,  
14 Methodology, Software, Writing – review and editing. AMK: Conceptualization, Methodology,  
15 Writing – review and editing, Visualization, Supervision.

16

17 **Abstract**

18           Species distribution models (SDMs) are widely used to gain ecological understanding and  
19 guide conservation decisions. These models are developed with a wide variety of algorithms - from  
20 statistic-based approaches to more recent machine learning algorithms - but one property they all  
21 have in common is the use of predictors that strongly simplify the temporal variability of driving  
22 factors. On the other hand, recent architectures of deep learning neural networks allow dealing  
23 with fully explicit spatiotemporal dynamics and thus fitting SDMs without the need to simplify  
24 the temporal and spatial dimension of predictor data. We present a deep learning-based SDM  
25 approach that uses time series of spatial data as predictors, and compare it with conventional  
26 modelling approaches, using five well known invasive species. Deep learning approaches provided  
27 consistently high performing models while also avoiding the use of pre-processed predictor sets,  
28 that can obscure relevant aspects of environmental variation.

29

30 **Keywords:** Environmental niche model; WorldClim; Spatiotemporal dynamics; Convolutional  
31 neural networks; Residual networks; Inception time; Long short-term memory recurrent neural  
32 networks; AutoML

33

## 34 **Introduction**

35           Species distribution models (SDMs) have become indispensable tools for predicting the  
36 current and future distribution of species. Correlative-based SDMs measure the association  
37 between environmental predictors and species observation records in order to determine the  
38 probability of occurrence of species or the environmental suitability in new areas (Guisan &  
39 Zimmermann 2000; Elith & Leathwick 2009; Peterson *et al.* 2011; Araújo *et al.* 2019). These  
40 models can be built with statistic-based approaches and more recently, machine learning  
41 algorithms that have the ability to detect patterns in the data for which they were not explicitly  
42 programmed to look for (LeCun *et al.* 2015; Zhang & Li 2017; Christin *et al.* 2019). The flexibility  
43 and high performance of these latter approaches have made them the standard technique for several  
44 types of SDM-related biogeographical studies including estimating habitat suitability, species  
45 range expansion or contraction, invasion risk, and species co-occurrences (Pearson & Dawson  
46 2003; Elith *et al.* 2006; Elith & Leathwick 2009; Peterson *et al.* 2011; Norberg *et al.* 2019).

47           Since their inception, the methods used in SDMs have improved considerably (Araújo *et*  
48 *al.* 2019), with many new techniques being proposed (e.g., Phillips *et al.* 2006; Renner *et al.* 2015;  
49 Norberg *et al.* 2019), modelling workflows and reporting protocols being refined and standardized  
50 (Thuiller *et al.* 2009; Araújo *et al.* 2019; Feng *et al.* 2019; Zurell *et al.* 2020), and thorough inter-  
51 model comparisons of predictive accuracy being performed (Elith *et al.* 2006; Norberg *et al.* 2019).  
52 Thus, through this collective research effort and resulting improvements in model performance it  
53 is unclear whether there is room for substantial advancement in the performance or implementation  
54 of correlative SDMs. In fact, there is an extensive literature pertaining to their methodological  
55 limitations (e.g., Pearson & Dawson 2003; Hijmans 2012; Norberg *et al.* 2019; Milanesi *et al.*  
56 2020). Undoubtedly, analytical pitfalls are present even with optimized modeling architectures;

57 however, model quality will always depend on the availability and use of comprehensive  
58 distribution data and ecologically informative predictor variables (Pearson & Dawson 2003).

59 A common aim of SDMs is to identify the set of environmental combinations under which  
60 a species can occur and thrive (e.g., Guisan & Zimmermann 2000; Pearson *et al.* 2002; Pearson &  
61 Dawson 2003; Booth *et al.* 2014) and SDMs are typically built with temporally invariant  
62 summaries of multi-decadal long environmental variation by means of one or a few descriptive  
63 statistics, such as the mean and standard deviation (Elith & Leathwick 2009; Thuiller *et al.* 2009;  
64 Norberg *et al.* 2019). However, there are several reasons to believe that these pre-processed  
65 features of environmental variation, formulated based on expert opinion, are often not optimal  
66 from a predictive perspective. For example, although studies have shown that extreme climatic  
67 conditions are highly informative for predicting species distributions, these extremes are often not  
68 included in readily available datasets of bioclimatic variables and in SDMs (Zimmermann *et al.*  
69 2009; Reside *et al.* 2010; Morán-Ordóñez *et al.* 2018; Stewart *et al.* 2021).

70 It must also be acknowledged that most, if not all, factors driving species distributions (e.g.,  
71 climate, land-use) are temporally dynamic. That is, their state varies along time, a property that is  
72 often poorly represented, or entirely missing from SDMs. For example, while the distribution of  
73 species is often dependent on both the short- and long-term climatological conditions (Pearson &  
74 Dawson 2003; Peterson *et al.* 2011; Stewart *et al.* 2021), SDMs rarely account explicitly for  
75 temporal variation in these factors. Similarly, predictors representing recent patterns of land use  
76 can neglect the legacy of past land use patterns in shaping the observed species distributions  
77 (Polaina *et al.* 2019; Chen & Leites 2020). A more subtle common omission in predictors used in  
78 SDMs concerns the order in which events take place (Kriticos *et al.* 2012; Tyberghein *et al.* 2012;  
79 Assis *et al.* 2018; Title & Bemmels 2018). For example, areas with similar averaged annual

80 precipitation could have substantially different seasonality in the occurrence and magnitude of this  
81 factor (Figure 1), likely resulting in relevant differences in environmental suitability for species.  
82 In summary, the high dimensionality of spatial time-series data contains properties that are relevant  
83 for species distributions, but that human expertise may be unable to identify and thus represent in  
84 temporally invariant predictor sets.

85         One way to robustly address these limitations is by calibrating SDMs that consider the full  
86 representation of spatial and temporal variability in predictors sets. While this has been largely  
87 inaccessible owing to most predictive algorithms requiring tabular-type data, a structure inefficient  
88 in representing multidimensional data (Pebesma 2012), more recent deep learning-based models  
89 (Botella *et al.* 2018; Christin *et al.* 2019; Deneu *et al.* 2019; Alshahrani *et al.* 2021; Anand *et al.*  
90 2021; Borowiec *et al.* 2021; Huang & Basanta 2021) allow to express this high dimensionality  
91 with so called ‘tensor-type’ data structures. In simple terms, deep learning – a subfield of machine  
92 learning – is mainly concerned with the development of models that can automatically process  
93 raw, complex, high-dimensional predictor data, and extract useful attributes from it (the so called  
94 ‘features’) without user intervention (LeCun *et al.* 2015; Bengio *et al.* 2021). Recently, Capinha  
95 *et al.* (2021) demonstrated that some deep learning architectures allow using spatial time series  
96 data directly as predictors of ecological phenomena, hence overcoming the need of using  
97 temporally unvarying, pre-assembled, predictors sets. In addition, SDM practitioners have been  
98 also turning to deep learning (Anand *et al.* 2021), but as an alternative algorithms to use in  
99 conventional workflows with static predictors (e.g., Botella *et al.* 2018; Benkendorf & Hawkins  
100 2020; Rew *et al.* 2021).

101         While time-series-based deep learning networks thence have apparent practical and  
102 conceptual advantages over conventional approaches in the development of SDMs, to our

103 knowledge there is no robust comparison of the predictive performance of the two approaches.  
104 Hence, we here perform this assessment. Specifically, we use data from a range of taxa and  
105 geographical regions and measure the accuracy of predictions of species distributions obtained  
106 from deep learning algorithms using spatial time series as predictor variables and from  
107 conventional machine learning algorithms using ‘standard’ predictor variables. We compared and  
108 evaluated the results from both approaches to determine whether the theoretical advantages of deep  
109 learning with time-series data lead to practical benefits.

110

## 111 **Materials and methods**

### 112 **Species data**

113 Our analyses used data for five globally introduced, invasive species: *Cacyreus marshall*  
114 (geranium bronze butterfly; Federica *et al.* 2019), *Harmonia axyridis* (Asian harlequin  
115 ladybird; Bidinger *et al.* 2012), ), *Myiopsitta monachus* (monk parakeet; Bohl *et al.* 2019),  
116 *Pueraria montana* (kudzu; Callen & Miller 2015), and *Sus scrofa* (wild boar; Sales *et al.* 2017).  
117 Using data for invasive species matches a common use of SDMs (e.g., Elith & Graham 2009;  
118 Gallien *et al.* 2012; Mainali *et al.* 2015; Barbet-Massin *et al.* 2018; Liu *et al.* 2020), while also  
119 including common issues of non-stationarity and distribution data quality that may be absent from  
120 designed surveys. The number of occurrences and the extent of distribution ranges vary for each  
121 species and can be observed in Figure S1.

122 Ideally, SDMs are built using both presence and absence records; however, most  
123 commonly species absences are not recorded. A reasonable alternative is to use pseudo-absences,  
124 which are data points pulled from areas lacking recorded occurrences and assumed to represent

125 unsuitable conditions (Phillips *et al.* 2006; Elith & Leathwick 2009; Hijmans *et al.* 2017; Valavi  
126 *et al.* 2022). Because SDM results can be sensitive to the spatial extent used for pseudo-absence  
127 extraction (VanDerWal *et al.* 2009; Barbet-Massin *et al.* 2012), we performed this extraction from  
128 two sampling areas, each representing a distinct assumption. First, as invasive species are often  
129 transported widely across the globe (Liu *et al.* 2020), we randomly sampled 10,000 pseudo-  
130 absence points worldwide, except in locations where the species is recorded. Alternatively, and  
131 considering that the former procedure may overestimate the actual spread of the species (i.e., their  
132 absence may be due to dispersal limitations and not to unsuitable conditions), we delimited a  
133 second sampling area by creating a 1000-kilometer buffer around each species occurrence point  
134 and merging the obtained polygons. By sampling closer to where the species has been recorded,  
135 we expect the pseudo-absences to more closely represent areas made available to the species. From  
136 these areas we sampled a second set of 10,000 pseudo-absence points, also excluding locations  
137 having species records. Importantly, it is common practice to have a significantly larger number  
138 of pseudo-absences than presence records; however, having an imbalanced data set can produce  
139 inflated statistical scores (Jiménez-Valverde *et al.* 2009; Lunardon *et al.* 2014; Menardi & Torelli  
140 2014). Thus, for each species, we used the R package ‘ROSE’ (Random Over-Sampling  
141 Examples; Lunardon *et al.* 2014) to generated a bootstrap-sample of occurrences in each partition  
142 to match the number of pseudo-absence points to create a balanced data frame.

### 143 **Bioclimatic variables**

144 We used the WorldClim (<https://www.worldclim.org>) database, a collection of high-  
145 resolution terrestrial climate and weather data, to build our SDMs. WorldClim (Fick & Hijmans  
146 2017) provides both monthly weather maps (i.e., spatiotemporal time-series) spanning several  
147 decades, as well as set of 19 static spatial variables summarizing distinct aspects of the long-term

148 meteorological variation (the so-called 'bioclimatic' variables). These latter variables are derived  
149 from a 30-year spatial time series of monthly values of minimum, maximum temperature and  
150 precipitation recorded from 1970 to 2000 and are a widely used example of temporally static  
151 predictor data being used in conventional SDM approaches (e.g., Pearson & Dawson 2003; Elith  
152 *et al.* 2006; Phillips *et al.* 2006; Thuiller *et al.* 2009; Peterson *et al.* 2011; Booth *et al.* 2014;  
153 Hijmans *et al.* 2017; Morán-Ordóñez *et al.* 2018; Liu *et al.* 2020). Using this data source allows  
154 us to evaluate time-series deep learning networks on an equal footing with conventional methods  
155 by using the 30-year spatial time series (i.e., a 360-time step spatial series for each factor) as  
156 predictors in the deep-learning models and the 19 static bioclimatic summary variables in  
157 conventional algorithms. In addition, previous studies have shown that the inclusion of elevation  
158 data provides more accurate predictions (Hof *et al.* 2012; Oke & Thompson 2015; Kiser *et al.*  
159 2022); thus, we also used this data, as provided by WorldClim, in both sets of models. All predictor  
160 variables were extracted from 2.5 arc-minute spatial scale raster and polygon layers.

### 161 **Time series deep learning**

162 Currently, there are several existing deep learning architectures able to deal with temporal  
163 variability in predictor data (Box 1.) However, it is generally difficult to know a priori which type  
164 of architecture will work best for each task (He *et al.* 2021). As an alternative, 'Mcfly' (Van  
165 Kuppevelt *et al.* 2020), a TensorFlow (<https://www.tensorflow.org>) wrapper package incorporates  
166 automatized model assembly and learning procedures (i.e., AutoML; He *et al.* 2021); this  
167 assembles a collection of candidate models of different architectures with randomly defined  
168 hyperparameters, which are then trained, tuned, and tested to determine the most suitable model  
169 architecture and parametrization for the data being modeled. Mcfly offers four deep learning  
170 architectures able to use time series as predictor variables: convolutional neural networks (CNN);



171 Residual networks, (ResNet); Inception Time (IT); and long short-term memory recurrent neural  
172 networks (LSTM) (Box 1.). We use the AutoML feature of this package to generate five randomly  
173 assembled candidate models of each architecture (i.e., 20 total candidate models) and applied them  
174 to each species and buffer combination.

175 A standard way to evaluate the predictive accuracy of SDMs is to measure its ability to  
176 predict part of the distribution data left aside from model calibration (Guisan & Zimmermann  
177 2000; Norberg *et al.* 2019). As such, we partitioned our data into three sets; training data used for  
178 learning or calibrating a model; validation data for evaluating a model's performance during  
179 training or hyperparameter tuning; and a test set to evaluate the final model. Training, validation,  
180 and testing sets were 70%, 15%, 15% of the total dataset respectively. To reduce the computational  
181 costs in candidate model selection phase, we trained each candidate model using a random subset  
182 of ~50% of the training data during four calibration epochs, allowing an initial tuning of  
183 hyperparameters. Each model was then evaluated using classification accuracy on the validation  
184 data. The candidate model (out of the initial 20) with the highest accuracy score, was then trained  
185 a model with the full training set during 50 epochs. The predictive accuracy of the model in each  
186 epoch was evaluated using the validation data and measured with the area under the receiver  
187 operating curve (AUC). The AUC is a favored metric in SDM studies since it is independent of  
188 class prevalence (McPherson *et al.* 2004) and is threshold independent as opposed to metrics based  
189 on a single, often, arbitrary threshold (Brotons *et al.* 2004; Shabani *et al.* 2018). Finally, for each  
190 species and type of pseudo-absence data, we retained the epoch model with best AUC as our final  
191 model and evaluated it with the test data.

192 All deep learning models were built in Python Ver. 3.7.1 with the Keras Ver. 2.2.4  
193 (<https://keras.io>) and TensorFlow Version 2.5 (<https://www.tensorflow.org>) deep learning suites,

194 and the Mcfly Ver. 3.1.0 (Van Kuppevelt et al. 2020). For further review, model code and data  
195 can be found at Zenodo.org (DOI: 10.5281/zenodo.7255395), which should also allow non-experts  
196 to easily implement these methods.

## 197 **Conventional machine learning**

198 We used several geospatial packages for conventional ‘static’ species distribution modeling in  
199 R (Ver. 4.0.3), most notably ‘dismo’ (Hijmans *et al.* 2017). The 19 bioclimatic predictors were  
200 used for training and testing these models and are extracted from the raw time series data used in  
201 the deep learning models. We used three popular and typically well performing machine learning  
202 algorithms: Gradient Boosting Machines (GBM; e.g., Friedman 2001); Maximum Entropy  
203 (MaxEnt; Phillips *et al.* 2006; Elith *et al.* 2011); and Random Forest (RF; Breiman 2001; Cutler *et*  
204 *al.* 2007).

205 We used the same training and testing samples as for the deep learning models to build and  
206 test the static models. Note that, unlike the deep learning networks, the conventional algorithms use  
207 internal validation metrics, and thus it is not necessary to manually define validation datasets. For  
208 both deep learning and conventional models, we created global prediction maps. These maps are  
209 ranked gradient plots that represent variance and spatial uncertainty (Guisan & Zimmermann  
210 2000), which is often more important in studies pertaining to invasive species (Bidinger *et al.*  
211 2012; Sales *et al.* 2017; Barbet-Massin *et al.* 2018; Liu *et al.* 2020). We compared the deep learning  
212 predictions to the conventional predictions to measure model dissimilarity (Figure 2) by  
213 subtracting the raster pixel values of the conventional methods from those in deep learning rasters.  
214 Value of 0 indicated model agreement, positive values as areas where deep learning showed  
215 stronger suitability prediction, and negative values as areas where the conventional algorithm  
216 favored.

## 217 Results

218 There were no clear patterns regarding which candidate deep learning architectures were  
219 selected for each species and pseudo-absence extraction strategy (Table 1). LSTMs were selected  
220 the most frequently (4), followed by CNN (3), IT (2), and ResNet (1). LSTM were selected for  
221 two of five species, with CNN, IT, and ResNet being selected once for models using pseudo-  
222 absences extracted from 1000km buffers. Both LSTM and CNN were selected twice, and IT  
223 selected once for models using pseudo-absences extracted at the global scale. *Myiopsitta monachus*  
224 was the only species where both models were built using the same architecture, LSTM.

225 The time-series deep learning models using pseudo-absences extracted at the global scale  
226 scored an average AUC of 0.977 across all five species, with the lowest AUC measured for the  
227 wild boar model (0.925) and highest being the kudzu model (0.994) (Figure 3A; Table 1). The  
228 performances of these models were consistently equal to or second to the best conventional  
229 method, with a small average deviance from the top scoring model of 0.002. For the conventional  
230 models, RF scored the best for three species (*Cacyreus marshall*; *Pueraria montana*; and *Sus*  
231 *scrofa*) and MaxEnt for the other two species. GBM scored the lowest for all five species but only  
232 saw an average deviance of 0.014 and all species-model combinations scored an AUC above 0.9.  
233 When using pseudo-absences extracted from 1000km buffers, all algorithms achieved lower, but  
234 still very good AUC values (average AUC across all models = 0.932; Figure 3B). The deep  
235 learning models scored AUC values above 0.9 for all five species, with only RF doing the same.  
236 Deep learning models scored the best for *Cacyreus marshall*, *Harmonia axyridis*, and *Sus scrofa*  
237 while RF and Maxent scored the best for *Pueraria montana* and *Myiopsitta monachus* respectively,  
238 though DL placed second in both cases. GBM consistently placed the lowest among the algorithms  
239 for all five species with an average deviance of 0.032 from the best scoring algorithm.

240 Each model produced a global prediction raster which ranked location suitability from 0 -  
241 1 (Figures S2:S11). Deep learning models predicted higher suitability scores (0.8 -1) around  
242 occurrence points and a smoother gradient between them. MaxEnt and RF models most frequently  
243 showed higher suitability scores at more isolated locations, generally near the recorded  
244 occurrences. GBM models were the most inconsistent as they showed some degree of suitability  
245 on all parts of the globe. For all five species, models built with global background points showed  
246 more conservative ranges where models using background points pulled from a 1000km buffer  
247 showed a more expanded potential range.

248 For both sets of models, deep learning ranked suitable locations higher than MaxEnt or RF  
249 even when model predictions agreed, while deep learning and GBM models showed a high degree  
250 of dissimilarity (Figures S12:S21). When comparing the results using point from different spatial  
251 extents, deep learning models showed the most agreement between predictions, while conventional  
252 methods were more variable (Figure S22:S26).

253

## 254 **Discussion**

255 To our knowledge, this is the first study comparing SDMs built from spatial time series  
256 based deep-learning models to conventional machine learning algorithms. Deep learning can  
257 address several conceptual concerns seen in conventional modeling methods, especially potential  
258 human-mediated omissions, or bias in selection of features to represent in the predictor dataset.  
259 These methods also allow the model to account for temporal environmental variation, something  
260 known to be biologically relevant and not well-represented in pre-assembled sets of bioclimatic  
261 variables (Morán-Ordóñez et al., 2018, Reside et al., 2010, Stewart et al., 2021, Zimmermann et  
262 al., 2009). Here we show the performance of randomly generated deep learning models was

263 similar to or exceeded conventional static methods. Our results extend the findings from previous  
264 studies (Botella *et al.* 2018; Benkendorf & Hawkins 2020; Anand *et al.* 2021; Capinha *et al.* 2021;  
265 Rew *et al.* 2021) showing that deep learning is an extremely powerful approach, and suggest that  
266 these models should be increasingly considered for species distribution modeling, especially with  
267 the use of spatial time series data.

268 Each of the four deep learning architectures were selected for at least one species and  
269 pseudo-absence combination, with LSTM and CNN being the most commonly selected.  
270 Considering that we use a relatively small sample of candidate models ( $n = 20$ ) for each species  
271 and type of pseudo-absence extraction strategy, there are likely to be significant gains in  
272 performance by understanding the strengths of different architectures and their components and  
273 doing more intensive optimization of hyper-parameters. Like conventional ANNs, the  
274 convergence of training and validation AUCs and model accuracy are dependent on the number of  
275 training epochs performed (Fawaz *et al.* 2019; Benkendorf & Hawkins 2020; Capinha *et al.* 2021).  
276 While our models ran 50 epochs, further analysis is recommended on the effect this has on time  
277 series DL-SDMs.

278 We used a simple random subset of the data to select among candidate architectures of  
279 deep learning models and to determine the maximum number of epochs that the models should  
280 train for (i.e., the number of times the full set of training data passes through the network, adjusting  
281 model weights). This approach still prevails in the field (Araújo *et al.*, 2019) and here has produced  
282 robust final models (e.g., when comparing its predictive performance to most of the conventional  
283 models); however, it might also be worth exploring data splitting strategies that more carefully  
284 consider the non-independence of data points, as caused for instance by spatial autocorrelation  
285 (Araújo *et al.*, 2019; Ploton *et al.*, 2020), including the spatial cross-validation method (Elith &

286 Leathwick 2009; Hijmans 2012; Wenger & Olden 2012; Roberts *et al.* 2017; Ploton *et al.* 2020).  
287 Thus, one challenge that deserves particular attention is that of model overfitting. Given the high  
288 number of trainable parameters found in deep learning models, particular care should be taken to  
289 prevent overfitting (Li *et al.* 2019; Benkendorf & Hawkins 2020). Under these circumstances, the  
290 data splitting strategies used to inform the model about ‘the reality it should search for’ takes on  
291 significant relevance.

292 Measuring the differences in spatial predictions between suitability maps resulting from  
293 different algorithms trained on the same data is one way to assess predictive uncertainty (Kearney  
294 *et al.* 2010; Beale & Lennon 2012; Iturbide *et al.* 2018). In this study, we compared prediction by  
295 calculating the difference between time series deep learning maps to the conventional algorithms,  
296 and by comparing the predictions across two different spatial extents. Our results show that time  
297 series deep learning models generally predicted an area of relatively high suitability intermediate  
298 to the range of some conventional algorithms. Also, deep learning models were the most similar  
299 across both spatial extents, which can be a common problem in conventional workflows.  
300 However, we note that determining which model is not a trivial process but requires extensive  
301 validation assessment to remove uncertainty (Huang *et al.* 2018; Iturbide *et al.* 2018; Norberg *et*  
302 *al.* 2019; Grimmer *et al.* 2020). Converting to binary maps can simplify the decision process, but  
303 only when an appropriate threshold is implemented, which is equally difficult to evaluate (Liu *et*  
304 *al.* 2005; Jiménez-Valverde & Lobo 2007; Liu *et al.* 2009). Thus, further review of these methods  
305 should be explored, including whether it makes sense to make ensemble models between  
306 conventional and deep learning predictions, or between deep learning architectures.

307 Despite the results obtained, it is unlikely that time-series models will always outperform  
308 conventional approaches. For example, in cases where deep learning models performed best, the

309 difference was generally small to the best performing conventional model. This is likely to be the  
310 common case for large-scale distribution patterns, that respond strongly to general, long-term  
311 patterns of climate (Pearson & Dawson 2003), which tend to be well represented in the existing  
312 repositories of pre-processed climatic features. Instead, we argue that the capacity of time-series  
313 deep learning models for considering a higher dimensionality of possibly relevant features makes  
314 them better equipped to make accurate predictions under a wider diversity of settings, spanning  
315 from distributions shaped by the simpler patterns of climate to those resulting from an intricate  
316 web of relationships involving complex spatial and temporal dynamics of multiple factors.

317 In addition, although time-series deep learning models could bring substantial benefits to  
318 SDMs, there are also several other limitations worth addressing, though most of these are also  
319 faced by conventional approaches. These include spatial autocorrelation (F. Dormann *et al.* 2007),  
320 extrapolation errors (Liu *et al.* 2020), data imbalance (Jiménez-Valverde *et al.* 2009), or sampling  
321 bias (Fithian *et al.* 2015). This assumes particular significance if the predictions are aimed for new  
322 regions or time periods, i.e., are to be ‘transferred’ (e.g., Yates *et al.* 2018; Liu *et al.* 2020; Taheri  
323 *et al.* 2021). The challenges imposed by these issues are inherent to the early stage of using these  
324 models for species distribution modelling. Hence, we expect that, as these issues become  
325 increasingly explored, the hurdles they cause will become resolved to some extent – in a similar  
326 manner to what occurred for conventional models. However, it is important not to underestimate  
327 the potential complexity of these tasks, particularly given the higher dimensionality of the  
328 predictor data that are now involved (for example, our conventional static machine learning models  
329 were given ~380,000 measurements to process i.e., 19 BIO variables × ~20,000 instances, where  
330 the time-series DL models were fed ~28,800,000 i.e., 4 time series × ~20,000 instances × 360 time  
331 steps.

## 332 **Conclusion**

333           We have described and demonstrated conceptual and practical benefits of deep learning  
334 models for predicting species distributions. The capacity of these models to automatically identify  
335 relevant features from, high-dimensional, temporal data reduces reliance on human supervision in  
336 the definition of relevant environmental features to include in the models. This can advance the  
337 field by providing robust predictions even when a priori knowledge about the features that are  
338 most influential in shaping species distributions is limited, while matching the performance of  
339 existing methods in well understood systems. However, several challenges still need to be  
340 addressed before the full potential of these models becomes realized. We hope to facilitate and  
341 encourage ecological modellers to explore, test and help overcome the limitations of deep learning  
342 models to advance understanding of species distributions, much in the way that conventional  
343 models were explored and improved over the last twenty years.



344 **References**

- 345 1.  
346 Alshahrani, H.M., Al-Wesabi, F.N., Al Duhayyim, M., Nemri, N., Kadry, S. & Alqaralleh, B.A.  
347 (2021). An automated deep learning based satellite imagery analysis for ecology  
348 management. *Ecological Informatics*, 66, 101452.
- 349 2.  
350 Anand, A., Pandey, M.K., Srivastava, P.K., Gupta, A. & Khan, M.L. (2021). Integrating Multi-  
351 Sensors Data for Species Distribution Mapping Using Deep Learning and Envelope  
352 Models. *Remote Sensing*, 13, 3284.
- 353 3.  
354 Araújo, M.B., Anderson, R.P., Barbosa, A.M., Beale, C.M., Dormann, C.F., Early, R. *et al.*  
355 (2019). Standards for distribution models in biodiversity assessments. *Science Advances*,  
356 5, eaat4858.
- 357 4.  
358 Assis, J., Tyberghein, L., Bosch, S., Verbruggen, H., Serrão, E.A. & De Clerck, O. (2018). Bio-  
359 ORACLE v2. 0: Extending marine data layers for bioclimatic modelling. *Global Ecology*  
360 *and Biogeography*, 27, 277-284.
- 361 5.  
362 Barbet-Massin, M., Rome, Q., Villemant, C. & Courchamp, F. (2018). Can species distribution  
363 models really predict the expansion of invasive species? *PloS one*, 13, e0193085.
- 364 6.  
365 Barbet-Massin, M., Jiguet, F., Albert, C.H. & Thuiller, W. (2012). Selecting pseudo-absences for  
366 species distribution models: how, where and how many? *Methods in ecology and*  
367 *evolution*, 3, 327-338.
- 368 7.  
369 Beale, C.M. & Lennon, J.J. (2012). Incorporating uncertainty in predictive species distribution  
370 modelling. *Philosophical Transactions of the Royal Society B: Biological Sciences*, 367,  
371 247-258.
- 372 8.  
373 Bengio, Y., Lecun, Y. & Hinton, G. (2021). Deep learning for AI. *Communications of the ACM*,  
374 64, 58-65.
- 375 9.  
376 Benkendorf, D.J. & Hawkins, C.P. (2020). Effects of sample size and network depth on a deep  
377 learning approach to species distribution modeling. *Ecological Informatics*, 60, 101137.
- 378 10.  
379 Bidinger, K., Lötters, S., Rödder, D. & Veith, M. (2012). Species distribution models for the  
380 alien invasive Asian Harlequin ladybird (*Harmonia axyridis*). *Journal of Applied*  
381 *Entomology*, 136, 109-123.
- 382 11.  
383 Bishop, C.M. (1995). *Neural networks for pattern recognition*. Oxford university press.
- 384 12.  
385 Bohl, C.L., Kass, J.M. & Anderson, R.P. (2019). A new null model approach to quantify  
386 performance and significance for ecological niche models of species distributions.  
387 *Journal of Biogeography*, 46, 1101-1111.
- 388 13.

- 389 Booth, T.H., Nix, H.A., Busby, J.R. & Hutchinson, M.F. (2014). BIOCLIM: the first species  
390 distribution modelling package, its early applications and relevance to most current  
391 MAXENT studies. *Diversity and Distributions*, 20, 1-9.
- 392 14.
- 393 Borowiec, M.L., Dikow, R.B., Frandsen, P.B., McKeeken, A., Valentini, G. & White, A.E.  
394 (2021). Deep learning as a tool for ecology and evolution. *Methods in Ecology and*  
395 *Evolution*.
- 396 15.
- 397 Botella, C., Joly, A., Bonnet, P., Monestiez, P. & Munoz, F. (2018). A deep learning approach to  
398 species distribution modelling. In: *Multimedia Tools and Applications for Environmental*  
399 *& Biodiversity Informatics*. Springer, pp. 169-199.
- 400 16.
- 401 Breiman, L. (2001). Random forests. *Machine learning*, 45, 5-32.
- 402 17.
- 403 Brotons, L., Thuiller, W., Araújo, M.B. & Hirzel, A.H. (2004). Presence-absence versus  
404 presence-only modelling methods for predicting bird habitat suitability. *Ecography*, 27,  
405 437-448.
- 406 18.
- 407 Callen, S.T. & Miller, A.J. (2015). Signatures of niche conservatism and niche shift in the North  
408 American kudzu (*Pueraria montana*) invasion. *Diversity and Distributions*, 21, 853-863.
- 409 19.
- 410 Capinha, C., Ceia-Hasse, A., Kramer, A.M. & Meijer, C. (2021). Deep learning for supervised  
411 classification of temporal data in ecology. *Ecological Informatics*, 61, 101252.
- 412 20.
- 413 Chen, X. & Leites, L. (2020). The importance of land-use legacies for modeling present-day  
414 species distributions. *Landscape Ecology*, 35, 2759-2775.
- 415 21.
- 416 Christin, S., Hervet, É. & Lecomte, N. (2019). Applications for deep learning in ecology.  
417 *Methods in Ecology and Evolution*, 10, 1632-1644.
- 418 22.
- 419 Chung, J., Gulcehre, C., Cho, K. & Bengio, Y. (2014). Empirical evaluation of gated recurrent  
420 neural networks on sequence modeling. *arXiv preprint arXiv:1412.3555*.
- 421 23.
- 422 Cutler, D.R., Edwards Jr, T.C., Beard, K.H., Cutler, A., Hess, K.T., Gibson, J. *et al.* (2007).  
423 Random forests for classification in ecology. *Ecology*, 88, 2783-2792.
- 424 24.
- 425 Deneu, B., Servajean, M., Botella, C. & Joly, A. (2019). Evaluation of Deep Species Distribution  
426 Models Using Environment and Co-occurrences. Springer International Publishing  
427 Cham, pp. 213-225.
- 428 25.
- 429 Elith, J. & Graham, C.H. (2009). Do they? How do they? WHY do they differ? On finding  
430 reasons for differing performances of species distribution models. *Ecography*, 32, 66-77.
- 431 26.
- 432 Elith, J., H. Graham, C., P. Anderson, R., Dudík, M., Ferrier, S., Guisan, A. *et al.* (2006). Novel  
433 methods improve prediction of species' distributions from occurrence data. *Ecography*,  
434 29, 129-151.

- 435 27.  
436 Elith, J. & Leathwick, J.R. (2009). Species distribution models: ecological explanation and  
437 prediction across space and time. *Annual review of ecology, evolution, and systematics*,  
438 40, 677-697.
- 439 28.  
440 Elith, J., Phillips, S.J., Hastie, T., Dudík, M., Chee, Y.E. & Yates, C.J. (2011). A statistical  
441 explanation of MaxEnt for ecologists. *Diversity and distributions*, 17, 43-57.
- 442 29.  
443 F. Dormann, C., M. McPherson, J., B. Araújo, M., Bivand, R., Bolliger, J., Carl, G. *et al.* (2007).  
444 Methods to account for spatial autocorrelation in the analysis of species distributional  
445 data: a review. *Ecography*, 30, 609-628.
- 446 30.  
447 Fawaz, H.I., Forestier, G., Weber, J., Idoumghar, L. & Muller, P.-A. (2019). Deep learning for  
448 time series classification: a review. *Data mining and knowledge discovery*, 33, 917-963.
- 449 31.  
450 Federica, P., Francesca, M., Cristiana, C., Silvia, G., Ramona, V., Sara, C. *et al.* (2019). From  
451 Africa to the Alps: risk assessment on an invasion by *Cacys marshalli* (Butler, 1898).  
452 *Journal of Insect Conservation*, 23, 279-288.
- 453 32.  
454 Feng, X., Park, D.S., Walker, C., Peterson, A.T., Merow, C. & Papeş, M. (2019). A checklist for  
455 maximizing reproducibility of ecological niche models. *Nature Ecology & Evolution*, 3,  
456 1382-1395.
- 457 33.  
458 Fick, S.E. & Hijmans, R.J. (2017). WorldClim 2: new 1-km spatial resolution climate surfaces  
459 for global land areas. *International journal of climatology*, 37, 4302-4315.
- 460 34.  
461 Fithian, W., Elith, J., Hastie, T. & Keith, D.A. (2015). Bias correction in species distribution  
462 models: pooling survey and collection data for multiple species. *Methods in Ecology and*  
463 *Evolution*, 6, 424-438.
- 464 35.  
465 Friedman, J.H. (2001). Greedy function approximation: a gradient boosting machine. *Annals of*  
466 *statistics*, 1189-1232.
- 467 36.  
468 Gallien, L., Douzet, R., Pratte, S., Zimmermann, N.E. & Thuiller, W. (2012). Invasive species  
469 distribution models—how violating the equilibrium assumption can create new insights.  
470 *Global Ecology and Biogeography*, 21, 1126-1136.
- 471 37.  
472 Grimm, L., Whittaker, R. & Horta, A. (2020). Presence-only species distribution models are  
473 sensitive to sample prevalence: Evaluating models using spatial prediction stability and  
474 accuracy metrics. *Ecological Modelling*, 431, 109194.
- 475 38.  
476 Guisan, A. & Zimmermann, N.E. (2000). Predictive habitat distribution models in ecology.  
477 *Ecological modelling*, 135, 147-186.
- 478 39.  
479 He, X., Zhao, K. & Chu, X. (2021). AutoML: A survey of the state-of-the-art. *Knowledge-Based*  
480 *Systems*, 212, 106622.

- 481 40.  
482 Hijmans, R.J. (2012). Cross-validation of species distribution models: removing spatial sorting  
483 bias and calibration with a null model. *Ecology*, 93, 679-688.
- 484 41.  
485 Hijmans, R.J., Phillips, S., Leathwick, J., Elith, J. & Hijmans, M.R.J. (2017). Package ‘dismo’.  
486 *Circles*, 9, 1-68.
- 487 42.  
488 Hof, A.R., Jansson, R. & Nilsson, C. (2012). The usefulness of elevation as a predictor variable  
489 in species distribution modelling. *Ecological Modelling*, 246, 86-90.
- 490 43.  
491 Huang, Q., Fleming, C.H., Robb, B., Lothspeich, A. & Songer, M. (2018). How different are  
492 species distribution model predictions?—Application of a new measure of dissimilarity  
493 and level of significance to giant panda *Ailuropoda melanoleuca*. *Ecological Informatics*,  
494 46, 114-124.
- 495 44.  
496 Huang, Y.-P. & Basanta, H. (2021). Recognition of Endemic Bird Species Using Deep Learning  
497 Models. *IEEE Access*, 9, 102975-102984.
- 498 45.  
499 Iturbide, M., Bedia, J. & Gutiérrez, J.M. (2018). Background sampling and transferability of  
500 species distribution model ensembles under climate change. *Global and Planetary*  
501 *Change*, 166, 19-29.
- 502 46.  
503 Jiménez-Valverde, A., Lobo, J. & Hortal, J. (2009). The effect of prevalence and its interaction  
504 with sample size on the reliability of species distribution models. *Community Ecology*,  
505 10, 196-205.
- 506 47.  
507 Jiménez-Valverde, A. & Lobo, J.M. (2007). Threshold criteria for conversion of probability of  
508 species presence to either–or presence–absence. *Acta oecologica*, 31, 361-369.
- 509 48.  
510 Kearney, M.R., Wintle, B.A. & Porter, W.P. (2010). Correlative and mechanistic models of  
511 species distribution provide congruent forecasts under climate change. *Conservation*  
512 *letters*, 3, 203-213.
- 513 49.  
514 Kiser, A.H., Cummings, K.S., Tiemann, J.S., Smith, C.H., Johnson, N.A., Lopez, R.R. *et al.*  
515 (2022). Using a multi-model ensemble approach to determine biodiversity hotspots with  
516 limited occurrence data in understudied areas: An example using freshwater mussels in  
517 México. *Ecology and Evolution*, 12, e8909.
- 518 50.  
519 Kriticos, D.J., Webber, B.L., Leriche, A., Ota, N., Macadam, I., Bathols, J. *et al.* (2012).  
520 CliMond: global high-resolution historical and future scenario climate surfaces for  
521 bioclimatic modelling. *Methods in Ecology and Evolution*, 3, 53-64.
- 522 51.  
523 LeCun, Y., Bengio, Y. & Hinton, G. (2015). Deep learning. *nature*, 521, 436-444.
- 524 52.

- 525 Li, H., Li, J., Guan, X., Liang, B., Lai, Y. & Luo, X. (2019). Research on overfitting of deep  
526 learning. In: *2019 15th International Conference on Computational Intelligence and*  
527 *Security (CIS)*. IEEE, pp. 78-81.
- 528 53.
- 529 Liu, C., Berry, P.M., Dawson, T.P. & Pearson, R.G. (2005). Selecting thresholds of occurrence  
530 in the prediction of species distributions. *Ecography*, 28, 385-393.
- 531 54.
- 532 Liu, C., White, M. & Newell, G. (2009). Measuring the accuracy of species distribution models:  
533 a review. In: *Proceedings 18th World IMACs/MODSIM Congress. Cairns, Australia*, p.  
534 4247.
- 535 55.
- 536 Liu, C., Wolter, C., Xian, W. & Jeschke, J.M. (2020). Species distribution models have limited  
537 spatial transferability for invasive species. *Ecology Letters*, 23, 1682-1692.
- 538 56.
- 539 Lunardon, N., Menardi, G. & Torelli, N. (2014). ROSE: A Package for Binary Imbalanced  
540 Learning. *R journal*, 6.
- 541 57.
- 542 Mainali, K.P., Warren, D.L., Dhileepan, K., McConnachie, A., Strathie, L., Hassan, G. *et al.*  
543 (2015). Projecting future expansion of invasive species: comparing and improving  
544 methodologies for species distribution modeling. *Global change biology*, 21, 4464-4480.
- 545 58.
- 546 McPherson, J.M., Jetz, W. & Rogers, D.J. (2004). The effects of species' range sizes on the  
547 accuracy of distribution models: ecological phenomenon or statistical artefact? *Journal of*  
548 *applied ecology*, 41, 811-823.
- 549 59.
- 550 Menardi, G. & Torelli, N. (2014). Training and assessing classification rules with imbalanced  
551 data. *Data mining and knowledge discovery*, 28, 92-122.
- 552 60.
- 553 Milanesi, P., Della Rocca, F. & Robinson, R.A. (2020). Integrating dynamic environmental  
554 predictors and species occurrences: Toward true dynamic species distribution models.  
555 *Ecology and evolution*, 10, 1087-1092.
- 556 61.
- 557 Morán-Ordóñez, A., Briscoe, N.J. & Wintle, B.A. (2018). Modelling species responses to  
558 extreme weather provides new insights into constraints on range and likely climate  
559 change impacts for Australian mammals. *Ecography*, 41, 308-320.
- 560 62.
- 561 Norberg, A., Abrego, N., Blanchet, F.G., Adler, F.R., Anderson, B.J., Anttila, J. *et al.* (2019). A  
562 comprehensive evaluation of predictive performance of 33 species distribution models at  
563 species and community levels. *Ecological Monographs*, 89, e01370.
- 564 63.
- 565 Oke, O.A. & Thompson, K.A. (2015). Distribution models for mountain plant species: the value  
566 of elevation. *Ecological Modelling*, 301, 72-77.
- 567 64.
- 568 Pearson, R.G. & Dawson, T.P. (2003). Predicting the impacts of climate change on the  
569 distribution of species: are bioclimate envelope models useful? *Global ecology and*  
570 *biogeography*, 12, 361-371.

- 571 65.  
572 Pearson, R.G., Dawson, T.P., Berry, P.M. & Harrison, P. (2002). SPECIES: a spatial evaluation  
573 of climate impact on the envelope of species. *Ecological modelling*, 154, 289-300.  
574 66.  
575 Pebesma, E. (2012). spactime: Spatio-temporal data in R. *Journal of statistical software*, 51, 1-  
576 30.  
577 67.  
578 Peterson, A.T., Soberón, J., Pearson, R.G., Anderson, R.P., Martínez-Meyer, E., Nakamura, M.  
579 *et al.* (2011). *Ecological niches and geographic distributions (MPB-49)*. Princeton  
580 University Press.  
581 68.  
582 Phillips, S.J., Anderson, R.P. & Schapire, R.E. (2006). Maximum entropy modeling of species  
583 geographic distributions. *Ecological modelling*, 190, 231-259.  
584 69.  
585 Ploton, P., Mortier, F., Réjou-Méchain, M., Barbier, N., Picard, N., Rossi, V. *et al.* (2020).  
586 Spatial validation reveals poor predictive performance of large-scale ecological mapping  
587 models. *Nature communications*, 11, 1-11.  
588 70.  
589 Polaina, E., González-Suárez, M. & Revilla, E. (2019). The legacy of past human land use in  
590 current patterns of mammal distribution. *Ecography*, 42, 1623-1635.  
591 71.  
592 Renner, I.W., Elith, J., Baddeley, A., Fithian, W., Hastie, T., Phillips, S.J. *et al.* (2015). Point  
593 process models for presence-only analysis. *Methods in Ecology and Evolution*, 6, 366-  
594 379.  
595 72.  
596 Reside, A.E., VanDerWal, J.J., Kutt, A.S. & Perkins, G.C. (2010). Weather, not climate, defines  
597 distributions of vagile bird species. *PloS one*, 5, e13569.  
598 73.  
599 Rew, J., Cho, Y. & Hwang, E. (2021). A robust prediction model for species distribution using  
600 bagging ensembles with deep neural networks. *Remote Sensing*, 13, 1495.  
601 74.  
602 Roberts, D.R., Bahn, V., Ciuti, S., Boyce, M.S., Elith, J., Guillera-Aroita, G. *et al.* (2017).  
603 Cross-validation strategies for data with temporal, spatial, hierarchical, or phylogenetic  
604 structure. *Ecography*, 40, 913-929.  
605 75.  
606 Sales, L.P., Ribeiro, B.R., Hayward, M.W., Paglia, A., Passamani, M. & Loyola, R. (2017).  
607 Niche conservatism and the invasive potential of the wild boar. *Journal of Animal*  
608 *Ecology*, 86, 1214-1223.  
609 76.  
610 Shabani, F., Kumar, L. & Ahmadi, M. (2018). Assessing accuracy methods of species  
611 distribution models: AUC, specificity, sensitivity and the true skill statistic. *Global*  
612 *Journal of Human Social Science*, 18, 6-18.  
613 77.  
614 Stewart, S., Elith, J., Fedrigo, M., Kasel, S., Roxburgh, S., Bennett, L. *et al.* (2021). Climate  
615 extreme variables generated using monthly time-series data improve predicted  
616 distributions of plant species. *Ecography*, 44, 626-639.

- 617 78.  
618 Taheri, S., Naimi, B., Rahbek, C. & Araújo, M.B. (2021). Improvements in reports of species  
619 redistribution under climate change are required. *Science Advances*, 7, eabe1110.  
620 79.  
621 Thuiller, W., Lafourcade, B., Engler, R. & Araújo, M.B. (2009). BIOMOD—a platform for  
622 ensemble forecasting of species distributions. *Ecography*, 32, 369-373.  
623 80.  
624 Title, P.O. & Bemmels, J.B. (2018). ENVIREM: an expanded set of bioclimatic and topographic  
625 variables increases flexibility and improves performance of ecological niche modeling.  
626 *Ecography*, 41, 291-307.  
627 81.  
628 Tyberghein, L., Verbruggen, H., Pauly, K., Troupin, C., Mineur, F. & De Clerck, O. (2012). Bio-  
629 ORACLE: a global environmental dataset for marine species distribution modelling.  
630 *Global ecology and biogeography*, 21, 272-281.  
631 82.  
632 Valavi, R., Guillera-Arroita, G., Lahoz-Monfort, J.J. & Elith, J. (2022). Predictive performance  
633 of presence-only species distribution models: a benchmark study with reproducible code.  
634 *Ecological Monographs*, 92, e01486.  
635 83.  
636 VanDerWal, J., Shoo, L.P., Graham, C. & Williams, S.E. (2009). Selecting pseudo-absence data  
637 for presence-only distribution modeling: how far should you stray from what you know?  
638 *Ecological modelling*, 220, 589-594.  
639 84.  
640 Wenger, S.J. & Olden, J.D. (2012). Assessing transferability of ecological models: an  
641 underappreciated aspect of statistical validation. *Methods in Ecology and Evolution*, 3,  
642 260-267.  
643 85.  
644 Yates, K.L., Bouchet, P.J., Caley, M.J., Mengersen, K., Randin, C.F., Parnell, S. *et al.* (2018).  
645 Outstanding challenges in the transferability of ecological models. *Trends in ecology &*  
646 *evolution*, 33, 790-802.  
647 86.  
648 Zhang, J. & Li, S. (2017). A Review of Machine Learning Based Species' Distribution  
649 Modelling. In: *2017 International Conference on Industrial Informatics-Computing*  
650 *Technology, Intelligent Technology, Industrial Information Integration (ICIICII)*. IEEE,  
651 pp. 199-206.  
652 87.  
653 Zimmermann, N.E., Yoccoz, N.G., Edwards, T.C., Meier, E.S., Thuiller, W., Guisan, A. *et al.*  
654 (2009). Climatic extremes improve predictions of spatial patterns of tree species.  
655 *Proceedings of the National Academy of Sciences*, 106, 19723-19728.  
656 88.  
657 Zurell, D., Franklin, J., König, C., Bouchet, P.J., Dormann, C.F., Elith, J. *et al.* (2020). A  
658 standard protocol for reporting species distribution models. *Ecography*, 43, 1261-1277.  
659

660 **TABLE 1** Summary of deep learning model selection and performance statistics.

**Global**

| <b>Species</b>             | <b>Architecture</b> | <b>Accuracy</b> | <b>Best epoch</b> | <b>Validation AUC</b> | <b>Test AUC</b> |
|----------------------------|---------------------|-----------------|-------------------|-----------------------|-----------------|
| <i>Cacyreus marshall</i>   | CNN                 | 0.968           | 14                | 0.988                 | 0.986           |
| <i>Harmonia axyridis</i>   | LSTM                | 0.933           | 2                 | 0.989                 | 0.988           |
| <i>Myiopsitta monachus</i> | LSTM                | 0.963           | 38                | 0.997                 | 0.991           |
| <i>Pueraria montana</i>    | CNN                 | 0.979           | 3                 | 0.995                 | 0.994           |
| <i>Sus scrofa</i>          | IT                  | 0.786           | 6                 | 0.92                  | 0.925           |

**1000km Buffer**

| <b>Species</b>             | <b>Architecture</b> | <b>Accuracy</b> | <b>Best epoch</b> | <b>Validation AUC</b> | <b>Test AUC</b> |
|----------------------------|---------------------|-----------------|-------------------|-----------------------|-----------------|
| <i>Cacyreus marshall</i>   | LSTM                | 0.843           | 46                | 0.923                 | 0.924           |
| <i>Harmonia axyridis</i>   | LSTM                | 0.863           | 14                | 0.943                 | 0.952           |
| <i>Myiopsitta monachus</i> | CNN                 | 0.889           | 50                | 0.966                 | 0.962           |
| <i>Pueraria montana</i>    | IT                  | 0.908           | 2                 | 0.971                 | 0.971           |
| <i>Sus scrofa</i>          | ResNet              | 0.731           | 26                | 0.901                 | 0.908           |



662

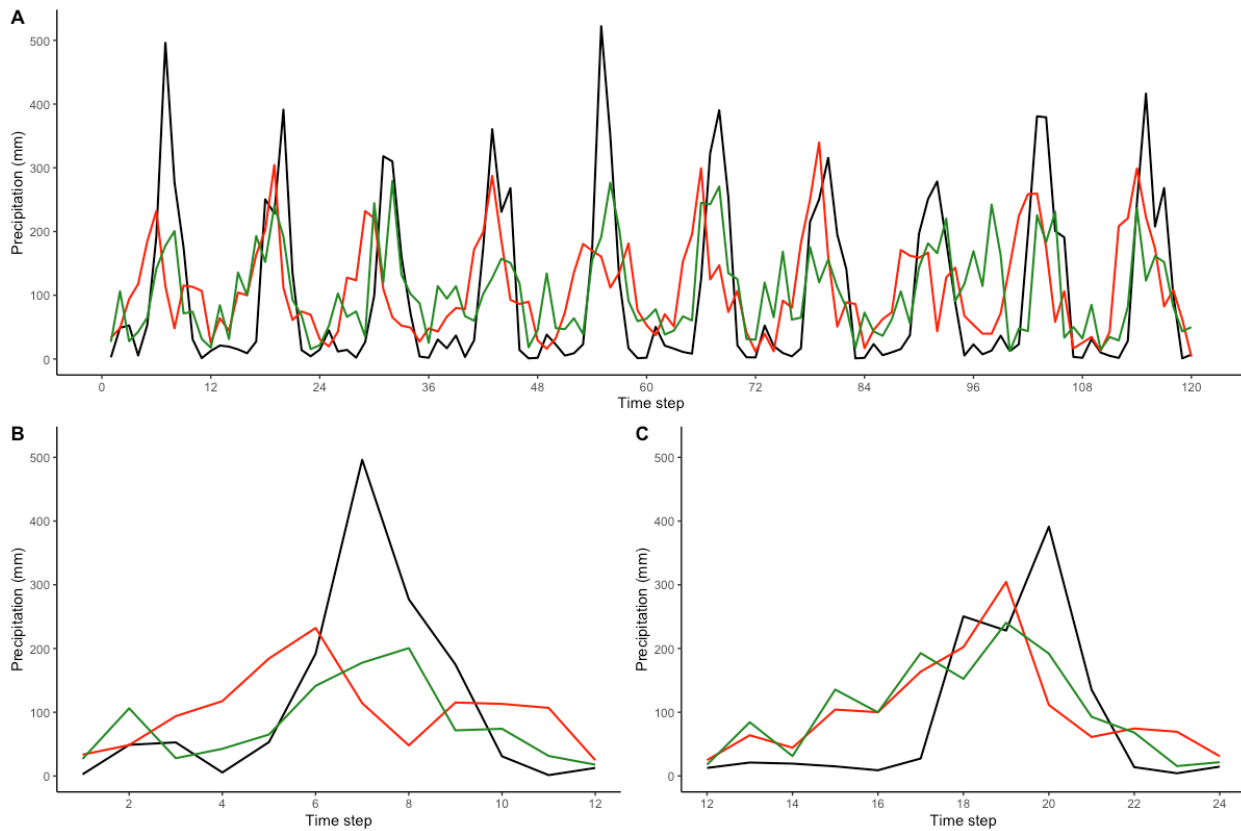

663

**FIGURE 1** A.) Precipitation data from the 1990 - 2000 for three locations that fall along the same lines of latitude. The locations include Tampa, FL, US (green line), Nainapur, Uttar Pradesh, India (black line), and Songtao Miao Autonomous County, Tongren, Guizhou, China (red line). These points were extracted from WorldClim BIO12, which measured averaged annual precipitation. All three points have roughly the same pixel value of 1260 mm. B.) precipitation for the year 1990 and C.) 1991. Note, precipitation not only differs spatial, but also temporally.

664

665

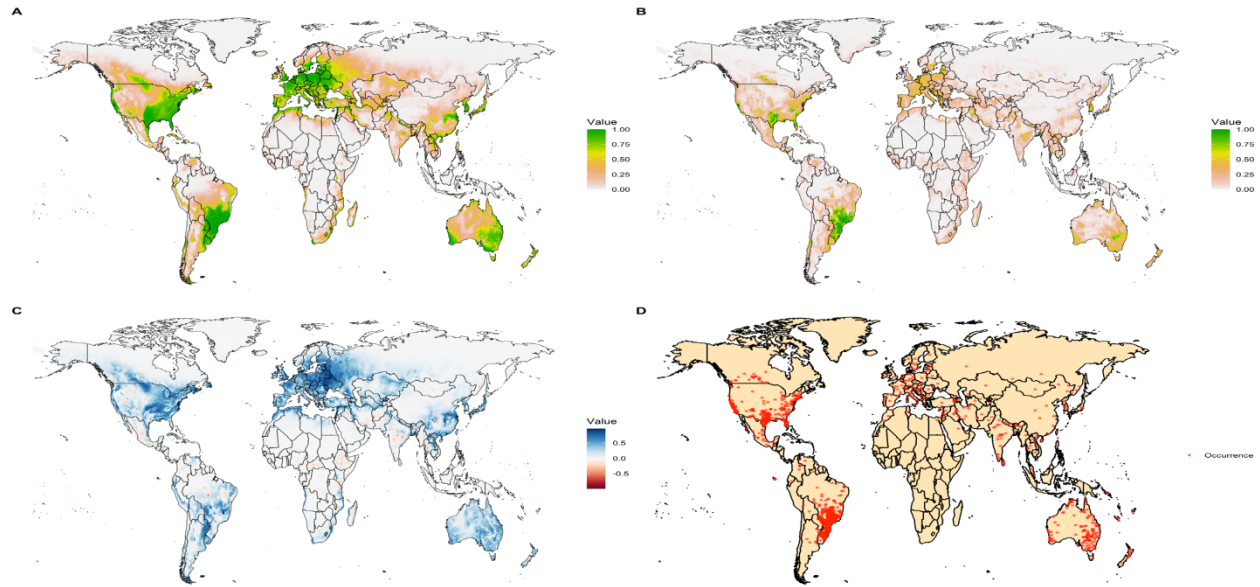

666

667 **FIGURE 2** Visual example of global predictions for global *Sus scrofa* models, with both A.)  
668 Deep Learning and B.) Random Forest, the best scoring conventional method. C.) Difference  
669 measure of the two models, which is produced by subtracting the pixel values of Random Forest  
670 from Deep Learning. Value of 0 indicates model agreement, where positive values (blue scale)  
671 are areas where Deep Learning has a stronger suitability prediction negative value (red scale) are  
672 areas where Random Forest favor. D.) The raw occurrence data used in the modeling process.

673

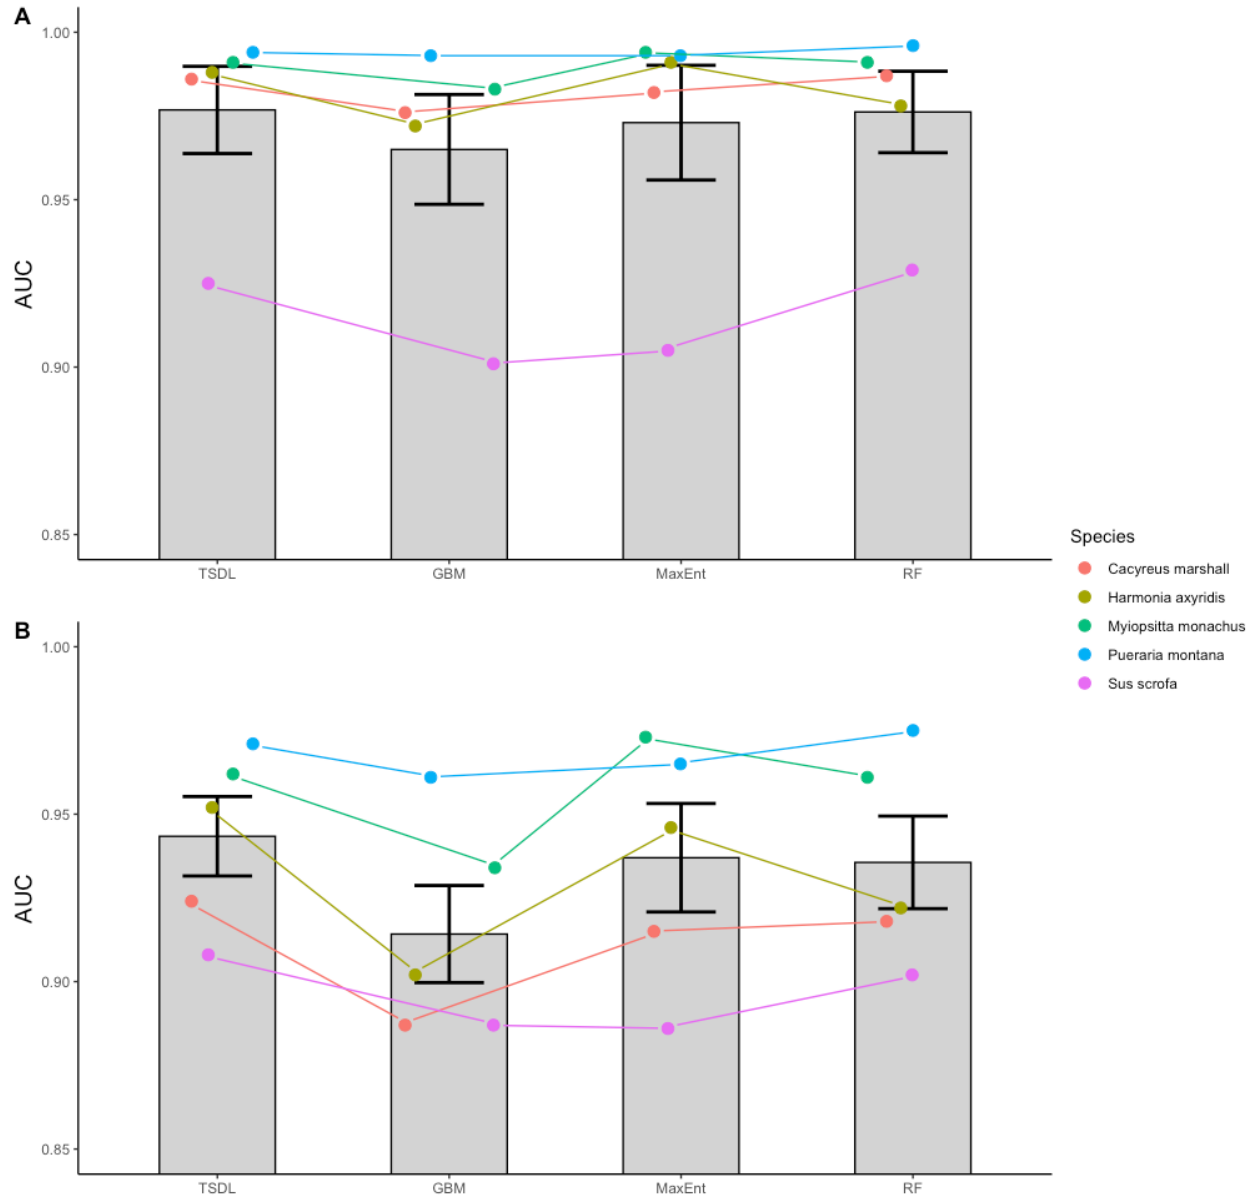

674

675 **FIGURE 3** A comparison of time series deep learning (TSDL) to gradient boosting machine  
676 (GBM), maximum entropy (MaxEnt), and random forest (RF) built using static bioclimatic  
677 variables. Models were built from both A.) a global spatial extent and B.) a reduced, 1000-  
678 kilometer extent. Gray bars represent the average AUC across all species and include standard  
679 error bars.

680

681 **BOX 1** Summary of deep learning architectures.

682           Deep learning is a complex network of processing levels known as artificial neural  
683 networks (ANNs) meant to replicate the functions of the human brain. ANNs are characterized  
684 by several stacked layers of information processing units or ‘neurons’, which are capable of  
685 transforming input data into simpler features. Traditional ANNs, like most modern algorithms,  
686 are constructed from pre-selected features and follow a feed-forward process; each iteration or  
687 epoch of the learning processes all the input data first, recalibrates internal hyperparameters, and  
688 then attempts to optimize until statistical convergence (Bishop 1995). Deep learning neural  
689 networks, on the other hand, often consists of multiple layers of ANNs processing at each  
690 internal layer.

691           Convolutional neural networks (CNNs) are one of two dominant categories of deep  
692 learning architectures. As the name implies, CNNs refer to convolutional layers; in essence,  
693 internal filter functions of varying length convolve with patches of the time series data to  
694 measure how much these represent features of presumed relevance. The filtered features are then  
695 processed in rectification and pooling layers, which transform data and reduce feature  
696 dimensionality for further analysis. The procedure can be replicated along stacked layers,  
697 resulting in a hierarchy of increasingly complex features. The final processing layer is a fully  
698 connected network that resembles a conventional ANN and is where classification outputs are  
699 generated. To optimize the learning objectives, different layers are added to the standard CNN  
700 protocol. For example, Residual networks (ResNets) are CNNs with additional process known as  
701 Residual Blocks which allow networks to perform both a feed-forward process and data  
702 processed in layers several steps ahead simultaneously. Likewise, Inception Time networks are a

703 sort of hybrid with standard CNNs and ResNet such that they use components of CNN  
704 convolutions and ResNet Residual Blocks, but in parallel.

705           The second category of architectures is recurrent neural networks (RNN), which were  
706 specifically designed to analyze sequential data (Fawaz *et al.* 2019). These models incorporate  
707 feedback loops, which allow models to learn from their own predictions, as well as the general  
708 trends in each layer. Standard RNNs tend to prioritize short-term signals over long-term trends  
709 (Chung *et al.* 2014). Therefore, the inclusion of “gated-units”, or algorithmic protocols that  
710 determine if networks should remember or forget information, were incorporated, thus forming  
711 the basis of LSTM models.  
712
